# Supplementary material
Source: publisher site journal article supplement (https://oneecosystem.pensoft.net/article/download/suppl/7836054/)
Supplement: Supplementary file 1

Appendix 1: The results of the internet search, including the exclusion criteria in the last eight columns. The tools highlighted in grey are those which were subject to an in-depth analysis.

| **Search terms** | **Tool name** | **Link** | **No city reference** | **Wrong topic** | **Insufficiently described** | **Still under development** | **No city-, district or site-level** | **No tool** | **Outdated (no functionality)** | **No climate adaptation measures** |
| --- | --- | --- | --- | --- | --- | --- | --- | --- | --- | --- |
| “Tool Hitze resiliente Stadt” | GREENPASS | https://greenpass.io/de/ |  |  |  |  |  |  |  |  |
| CLARITY Advanced Screening Tool | https://myclimateservices.eu/ |  |  |  |  |  |  |  |  |
| ISAP | https://www.fona.de/de/massnahmen/foerdermassnahmen/RegIKlim/isap.php |  |  |  | x |  |  |  |  |
| iResilience | http://iresilience-klima.de/ |  |  |  |  |  | x |  |  |
| Palm-4U | https://palm.muk.uni-hannover.de/mosaik/wiki/project/mission_de |  |  |  | x |  |  |  |  |
| INKAS-NRW | https://www.klimaanpassung-karte.nrw.de/?feld=inkas-nrw |  |  |  |  |  |  |  |  |
| Kompass Klimalotse | https://www.umweltbundesamt.de/themen/klima-energie/klimafolgenanpassung/werkzeuge-der-anpassung/klimalotse |  |  |  |  |  | x |  |  |
| Stadtklimalotse | http://www.plan-risk-consult.de/stadtklimalotse/ |  |  |  |  |  | x |  |  |
| Tatenbank | https://www.umweltbundesamt.de/themen/klima-energie/klimafolgen-anpassung/werkzeuge-der-anpassung/tatenbank |  |  |  |  |  | x |  |  |
| Future Cities Adaptation Compass | http://www.future-cities.eu/project/adaptation-compass/ |  |  |  |  |  |  |  |  |
| Adaptation Wizard | https://www.ukcip.org.uk/wizard/about-the-wizard/ |  |  |  |  |  | x |  |  |
| Urban Adaptation Support Tool | https://climate-adapt.eea.europa.eu/knowledge/tools/urban-ast/step-0-0 |  |  |  |  |  | x |  |  |
| KlimREG | https://klimreg.de/ |  |  |  |  |  | x |  |  |
| KLIMPRAX Stadtklima | https://www.hlnug.de/?id=10236 |  |  |  |  |  | x |  |  |
| Betroffenheitswizard | https://www.klimastadtraum.de/DE/Arbeitshilfen/Stadtklimalotse/LotsenNutzen/Zweckwahl/_form/zweckwahl_form.html |  |  |  |  |  |  |  |  |
| ReKIS | https://rekisviewer.hydro.tu-dresden.de/fdm/ReKISExpert.jsp |  |  |  |  | x |  |  |  |
| Klimanavigator | https://www.klimanavigator.eu/ |  |  |  |  |  | x |  |  |
| Deutscher Klimaatlas | https://www.dwd.de/DE/klimaumwelt/klimaatlas/klimaatlas_node.html |  |  |  |  | x |  |  |  |
| FITNAH | https://geo-net.de/de/wind/fitnah-3d.html |  | x |  |  |  |  |  |  |
| Ecoten | http://urban-comfort.eu/ |  |  |  |  |  | x |  |  |
| “Tool Klimaanpassung Stadt” | Regionaler Klimaatlass | https://www.regionaler-klimaatlas.de/ |  |  |  |  | x |  |  |  |
| GIS‐ImmoRisk | https://www.gisimmorisknaturgefahren.de/immorisk.html |  | x |  |  |  |  |  |  |
| Toolbox Klimaanpassung im Stadtumbau | <https://www.planergemeinschaft.de/toolbox/klimaanpassung-im-stadtumbau> |  |  |  |  |  | x |  |  |
| ESKAPE | https://inkasweb.regioit.de/inkasportal/ |  |  |  |  |  |  |  | x |
| Econadapt | https://econadapt-toolbox.eu/ |  |  |  |  |  | x |  |  |
| Jelka (Jenaer Entscheidungshilfe für lokale Klimaanpassung) | https://www.jenkas.de/jelka |  |  |  |  |  |  | x |  |
| Klimascout | <http://www.klimascout.de/kommunen/index.php?title=Ma%C3%9Fnahmen_zur_Anpassung_an_den_Klimawandel> |  |  |  |  |  | x |  |  |
| Stadtbaukasten | https://www.gerics.de/products_and_publications/toolkits/stadtbaukasten/index.php.de |  |  |  |  |  | x |  |  |
| GISCAME-Planungstool | [www.giscame.com](http://www.giscame.com/) | x |  |  |  |  |  |  |  |
| K.PLAN | http://k.plan.ruhr/planungstool.html |  |  | x |  |  |  |  |  |
| KLIMAMAP | <https://www.dortmund.de/de/leben_in_dortmund/umwelt/umweltamt/klimaschutz_energie/klima_ist_heimspiel/nachrichten_71/detailseiten_100.jsp?nid=634753> |  |  |  |  |  | x |  |  |
| KlimafolgenOnline | http://www.klimafolgenonline-bildung.de/ |  |  |  |  | x |  |  |  |
| Stadtgrün wertschätzen | https://stadtundgruen.de/artikel/stadtgruen-ist-mehrwert-12847.html |  | x |  |  |  |  |  |  |
| Risk Systemicity Questionnaire | https://smr-project.eu/tools/ |  | x |  |  |  |  |  |  |
| Disaster Resilience Scorecard for Cities | https://www.unisdr.org/campaign/resilientcities/toolkit/article/disaster-resilience-scorecard-for-cities |  | x |  |  |  |  |  |  |
| Quick Risk Estimation (QRE) | https://www.unisdr.org/campaign/resilientcities/toolkit/article/quick-risk-estimation-qre |  |  |  |  |  | x |  |  |
| Uscore2 - City-to-city peer review tool | https://www.unisdr.org/campaign/resilientcities/toolkit/article/city-to-city-peer-review-tool |  |  |  |  |  | x |  |  |
| URBAN HEAT RISK EXPLORER | https://www.unisdr.org/campaign/resilientcities/toolkit/article/urban-heat-risk-explorer |  |  |  |  |  |  | x |  |
| “Tool klimaresiliente Stadt” | City Performance Tool | https://new.siemens.com/de/de/unternehmen/themenfelder/intelligente-infrastruktur/city-performance-tool.html |  | x |  |  |  |  |  |  |
| “Tool hitzeangepasste Stadt” | Sonnenverlauf.de | Sonnenverlauf.de |  | x |  |  |  |  |  |  |
| “Tool heat resilient city” | C40 | https://c40.my.salesforce.com/sfc/p/#36000001Enhz/a/1Q000000kW3s/WErFiki_eMiovosLBRoAZAYzo1ThW2YNqfwtL2QHwKs |  |  |  |  |  |  |  |  |
| Adaptation support tool, auch Climate-proof City Toolbox | https://www.deltares.nl/en/software/adaptation-support-tool-ast/ |  |  |  |  |  |  |  |  |
| Climate Adaptation App | https://www.climateapp.org/ |  |  |  |  |  | x |  |  |
| Cool Towns | https://www.cooltowns.eu/results/ |  |  |  | x |  |  |  |  |
| STAIN | https://www.royalhaskoningdhv.com/en-gb/specials/stain |  |  | x |  |  |  |  |  |
| Microclimate and Urban Heat Island Mitigation Decision-Support Tool (UHI-DS) | http://uhimitigationindex.be.unsw.edu.au/uhitool/index.html |  |  |  |  |  |  |  |  |
| Urban Heat Island Mitigation Index | http://uhimitigationindex.be.unsw.edu.au/ |  |  |  |  |  | x |  |  |
| RESCCUE | http://www.resccue.eu/resccue-project |  | x |  |  |  |  |  |  |
| USDN Socioeconomic Mapping Tool for Climate Risk Planning | https://headwaterseconomics.org/apps/neighborhoods-at-risk/3900022610/explore/map |  | x |  |  |  |  |  |  |
| Climate Explorer Toolkit | https://www.noaa.gov/stories/climate-change-in-your-county-plan-with-new-tool |  |  |  |  |  |  | x |  |
| Climate Adaptation Guidance Tool | https://www.yarracity.vic.gov.au/about-us/sustainability-initiatives/climate-adaptation#accordion-climate-adaptation-guidance-tool |  |  |  |  |  | x |  |  |
| Extreme Heat Tool | https://cal-adapt.org/tools/extreme-heat/ |  |  |  |  |  | x |  |  |
| UCRA-Tool | https://projects.citiesalliance.org/projects/documents/Implementing_the_Urban_Community_Resilience_Assessment__UCRA__in_Three_Communities_in_Surat_City.pdf |  |  |  |  |  | x |  |  |
| “Tool heat adaptation city” | EU Urban Adaptation support tool/Climate-ADAPT | https://climate-adapt.eea.europa.eu/knowledge/tools/urban-ast/step-3-1 |  |  |  |  |  | x |  |  |
| Maine Adaptation Toolkit | https://www.maine.gov/dep/sustainability/climate/adaptation-toolkit.html |  |  |  |  |  | x |  |  |
| Urban Heat and Tree Mapping Tool | https://data.environment.sa.gov.au/Climate/Data-Systems/Urban-Heat-Mapping/Pages/default.aspx |  |  |  |  |  |  |  | x |
| Climate Lens | https://secure.infc.gc.ca/pub/other-autre/cl-occ-eng.html#1 |  |  |  |  |  | x |  |  |
| CREATE Climate Resilience Evaluation and Awareness Tool | https://epa.maps.arcgis.com/apps/MapSeries/index.html?appid=3805293158d54846a29f750d63c6890e |  |  |  |  | x |  |  |  |
